# Supplementary material for: The predictive performance of short-linear motif features in the prediction of calmodulin-binding proteins
Source: PubMed Central journal article supplement (PMC6245490; doi:10.1186/s12859-018-2378-9), 2018-11-20
Supplement: 12859_2018_2378_MOESM1_ESM.pdf [file 12859_2018_2378_MOESM1_ESM.pdf]

Table 1: Dataset of 194 human CaM-binding proteins and 193 Mitochondrial proteins used in this study.

| 194 CaM-binding Proteins   |        |        |        |        |        |        |        |        |        |
|----------------------------|--------|--------|--------|--------|--------|--------|--------|--------|--------|
| O00222                     | O95716 | P13797 | P23634 | P40145 | P80723 | Q13507 | Q15506 | Q99081 | Q9UGI6 |
| 00329                      | P00533 | P14151 | P23763 | P41594 | Q00722 | Q13554 | Q15746 | Q99250 | Q9UIK4 |
| O00418                     | P01236 | P15735 | P25098 | P42336 | Q01064 | Q13576 | Q15796 | Q99578 | Q9UL62 |
| O00445                     | P01833 | P15884 | P27987 | P42338 | Q01668 | Q13698 | Q15797 | Q99717 | Q9ULV0 |
| O00555                     | P02686 | P15923 | P28222 | P43250 | Q01814 | Q13813 | Q15835 | Q99996 | Q9UM54 |
| O14830                     | P08034 | P16520 | P29033 | P46939 | Q01844 | Q13884 | Q15836 | Q9H1R3 | Q9UPR5 |
| O14936                     | P08183 | P17600 | P29474 | P46940 | Q01970 | Q13936 | Q16566 | Q9H2S1 | Q9UQD0 |
| O14994                     | P08237 | P17677 | P29475 | P48454 | Q02952 | Q13972 | Q16720 | Q9H4G0 | Q9UQL6 |
| O15198                     | P08238 | P17844 | P29966 | P48539 | Q04206 | Q14012 | Q16816 | Q9HAV0 | Q9UQM7 |
| O15554                     | P08908 | P17858 | P30301 | P48736 | Q04864 | Q14028 | Q60343 | Q9HCX4 | Q9Y210 |
| O43525                     | P09496 | P18433 | P32298 | P48995 | Q05586 | Q14123 | Q86TI0 | Q9NQ66 | Q9Y2J2 |
| O43526                     | P09497 | P19634 | P32418 | P49006 | Q05682 | Q14524 | Q86U12 | Q9NQX4 | Q9Y4H2 |
| O43795                     | P11171 | P20020 | P34947 | P49815 | Q08209 | Q14571 | Q8NCM2 | Q9NR82 | Q9Y4I1 |
| O43815                     | P11233 | P20336 | P35498 | P53355 | Q08828 | Q14573 | Q92686 | Q9NRL3 | Q9Y623 |
| O75712                     | P11532 | P20337 | P35499 | P54750 | Q13033 | Q14643 | Q92736 | Q9NYC9 |        |
| O94832                     | P12883 | P20366 | P35568 | P55040 | Q13255 | Q14831 | Q92777 | Q9NZK7 |        |
| O95259                     | P13224 | P21439 | P35611 | P55042 | Q13402 | Q14833 | Q92952 | Q9NZQ3 |        |
| O95377                     | P13533 | P21579 | P35612 | P56696 | Q13424 | Q15051 | Q92963 | Q9UBC5 |        |
| O95452                     | P13535 | P21817 | P35626 | P57103 | Q13425 | Q15075 | Q96E17 | Q9UBN4 |        |
| O95613                     | P13796 | P23469 | P38936 | P61006 | Q13459 | Q15413 | Q96RJ0 | Q9UEY8 |        |
| 193 Mitochondrial Proteins |        |        |        |        |        |        |        |        |        |
| A8MTT3                     | O95167 | P21549 | P52789 | Q15031 | Q6NUN0 | Q8IYU8 | Q96DW6 | Q9BXI2 | Q9UGM6 |
| A8MUP2                     | O95169 | P21796 | P53007 | Q15119 | Q6P1Q0 | Q8IZJ6 | Q96EL3 | Q9BYT8 | Q9UHN1 |
| F7VJQ1                     | O95182 | P21953 | P55789 | Q16540 | Q6P587 | Q8N0X4 | Q96EY7 | Q9BZ23 | Q9UI43 |
| O00217                     | O96008 | P24310 | P56385 | Q16611 | Q6UW78 | Q8N159 | Q96EY8 | Q9BZE1 | Q9UJS0 |
| O00483                     | P00367 | P30042 | P59942 | Q16740 | Q6UXV4 | Q8N357 | Q96GC5 | Q9H2K0 | Q9UL12 |
| O15091                     | P03891 | P30049 | P61604 | Q16795 | Q6ZSR3 | Q8N3J5 | Q96I99 | Q9H2V7 | Q9Y375 |
| O15235                     | P03928 | P30536 | P78540 | Q16798 | Q6ZT89 | Q8N442 | Q96IL0 | Q9H4I9 | Q9Y3A0 |
| O15528                     | P07954 | P31415 | P82673 | Q16822 | Q709F0 | Q8N983 | Q96NB2 | Q9H5Q4 | Q9Y3D6 |
| O43181                     | P08574 | P36776 | P82909 | Q16836 | Q7KZN9 | Q8NAN2 | Q96RP9 | Q9H7H0 | Q9Y4W6 |
| O43615                     | P09622 | P36957 | P82912 | Q32NB8 | Q7L4E1 | Q8NB90 | Q96T66 | Q9HCM9 | Q9Y5J7 |
| O43715                     | P09669 | P46199 | P82933 | Q5EBM0 | Q7Z2W9 | Q8TCC3 | Q96TA2 | Q9HD33 | Q9Y5J9 |
| O43716                     | P10176 | P47985 | Q02127 | Q5HYI7 | Q7Z6M4 | Q8WUT9 | Q99551 | Q9NPB1 | Q9Y5Z4 |
| O60313                     | P11498 | P48201 | Q02318 | Q5JRX3 | Q7Z7H8 | Q8WY22 | Q99798 | Q9NQH7 | Q9Y6N1 |
| O75027                     | P12694 | P48735 | Q08AH3 | Q5RI15 | Q86U28 | Q92934 | Q9BPX6 | Q9NUJ1 |        |
| O75324                     | P13073 | P49753 | Q13011 | Q5SXM8 | Q86WU2 | Q969S9 | Q9BRQ8 | Q9NVA1 |        |
| O75380                     | P13196 | P49901 | Q13114 | Q5T653 | Q86X76 | Q96AG3 | Q9BSK2 | Q9NVH6 |        |
| O75390                     | P13995 | P50213 | Q13405 | Q5TC12 | Q86XF0 | Q96C03 | Q9BUE6 | Q9NVS2 |        |
| O75394                     | P14317 | P50336 | Q13423 | Q5TEU4 | Q8IVH4 | Q96D53 | Q9BUK6 | Q9NWU1 |        |
| O94925                     | P19099 | P51687 | Q13637 | Q63ZY3 | Q8IVP5 | Q96DP5 | Q9BW91 | Q9NYZ2 |        |
| O95139                     | P20674 | P51970 | Q14410 | Q61B77 | Q8IW45 | Q96DV4 | Q9BW92 | Q9UGC7 |        |
